# Supplementary material for: Linkages between atmospheric rivers and humid heat across the United States
Source: Copernicus journal article supplement (doi:10.5194/nhess-24-791-2024), 2024-03-06

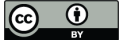

*Supplement of*

## **Linkages between atmospheric rivers and humid heat across the United States**

**Colin Raymond et al.**

*Correspondence to:* Colin Raymond ([csraymond@ucla.edu](mailto:csraymond@ucla.edu))

The copyright of individual parts of the supplement might differ from the article licence.

**Figure S1:** Illustration of the definition of a peak humid-heat day. Days marked 1 and 2 satisfy the requirements of having the highest Tw value within 3 days on either side, as well as Tw having been below the 90th percentile within the preceding 3 days, while day 3 does not. As stated in the text, these requirements can apply to data from an individual gridcell or to a regional (spatial) mean.

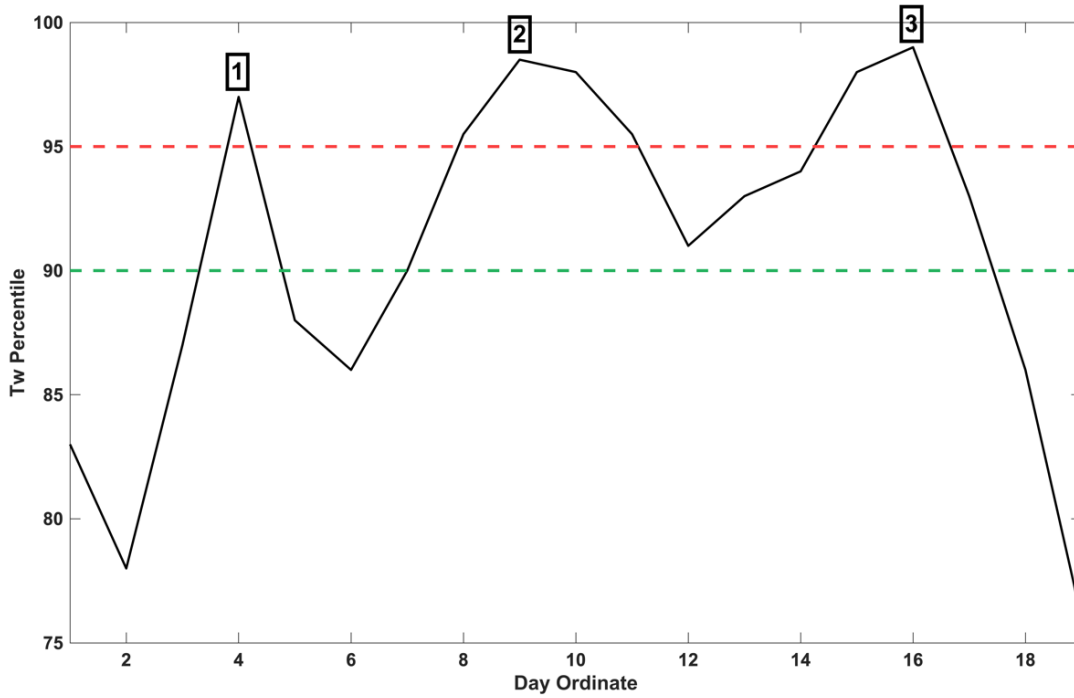

Figure S2: As in Figure 5 but for the Northwest region.

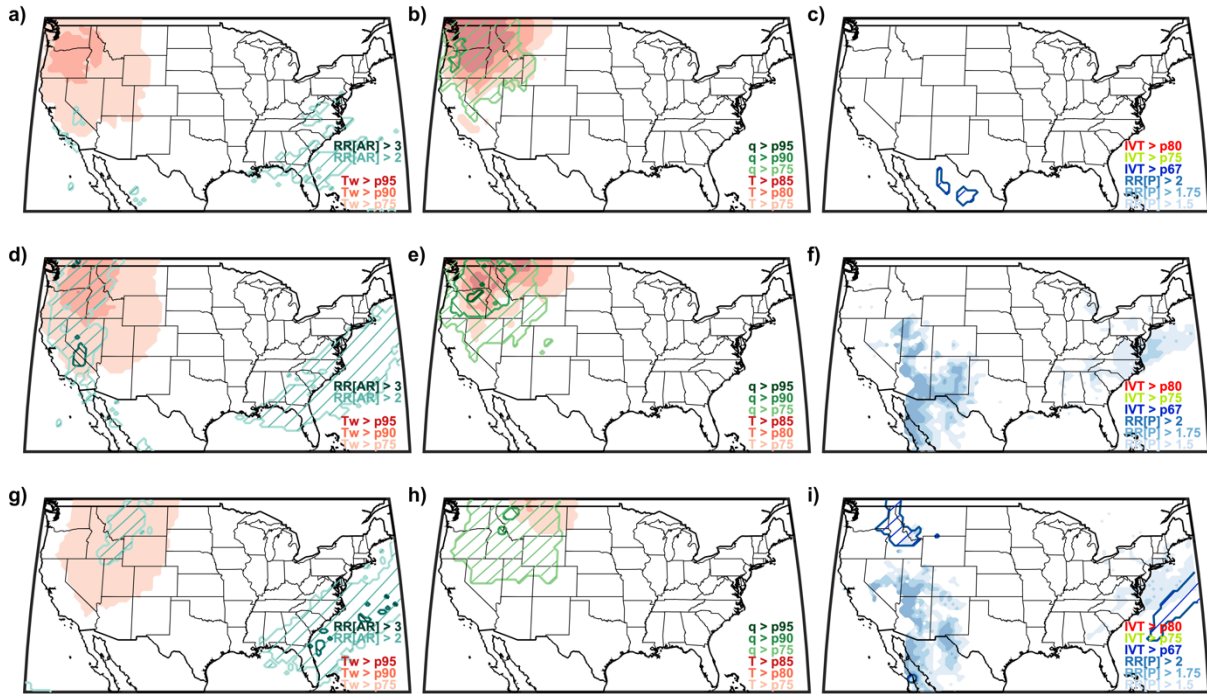

Figure S3: As in Figure 5 but for the Southwest region.

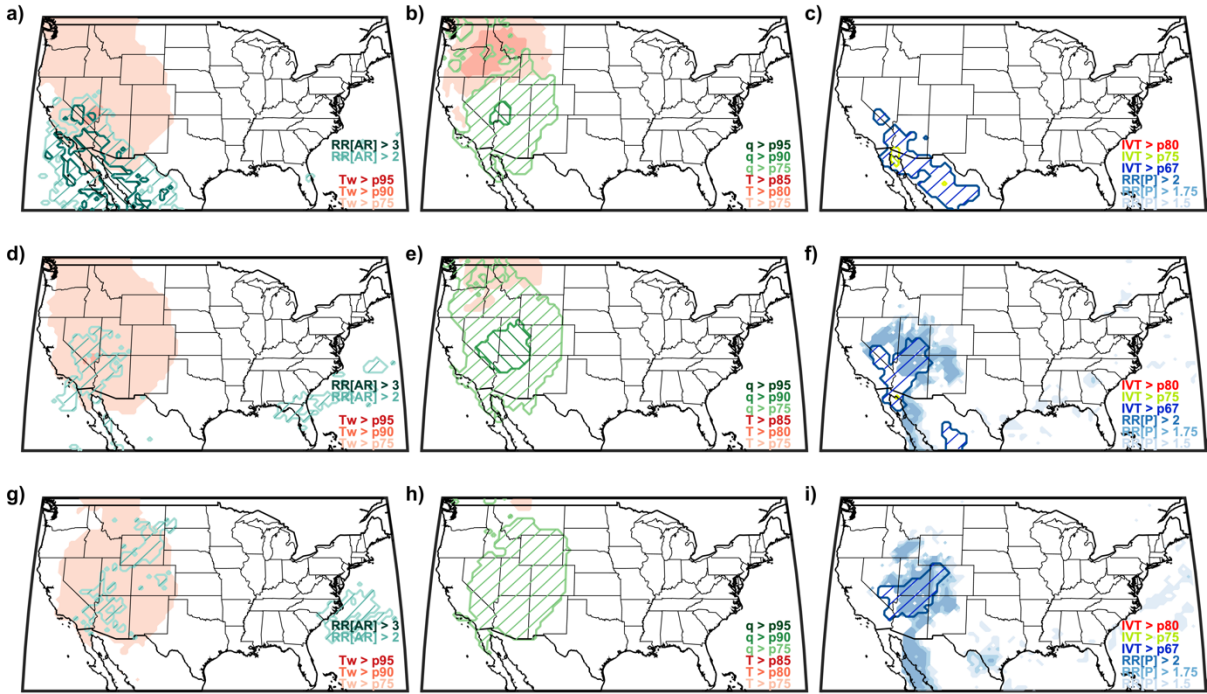

Figure S4: As in Figure 5 but for the Northern Great Plains region.

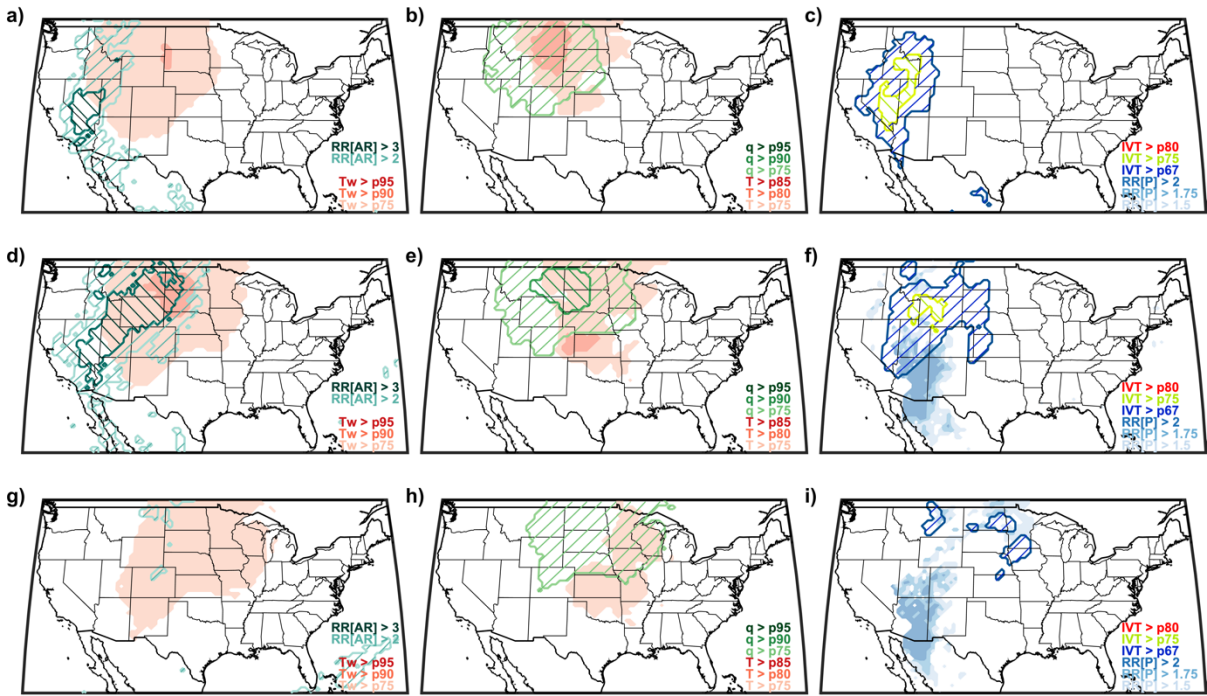

Figure S5: As in Figure 5 but for the Southern Great Plains region.

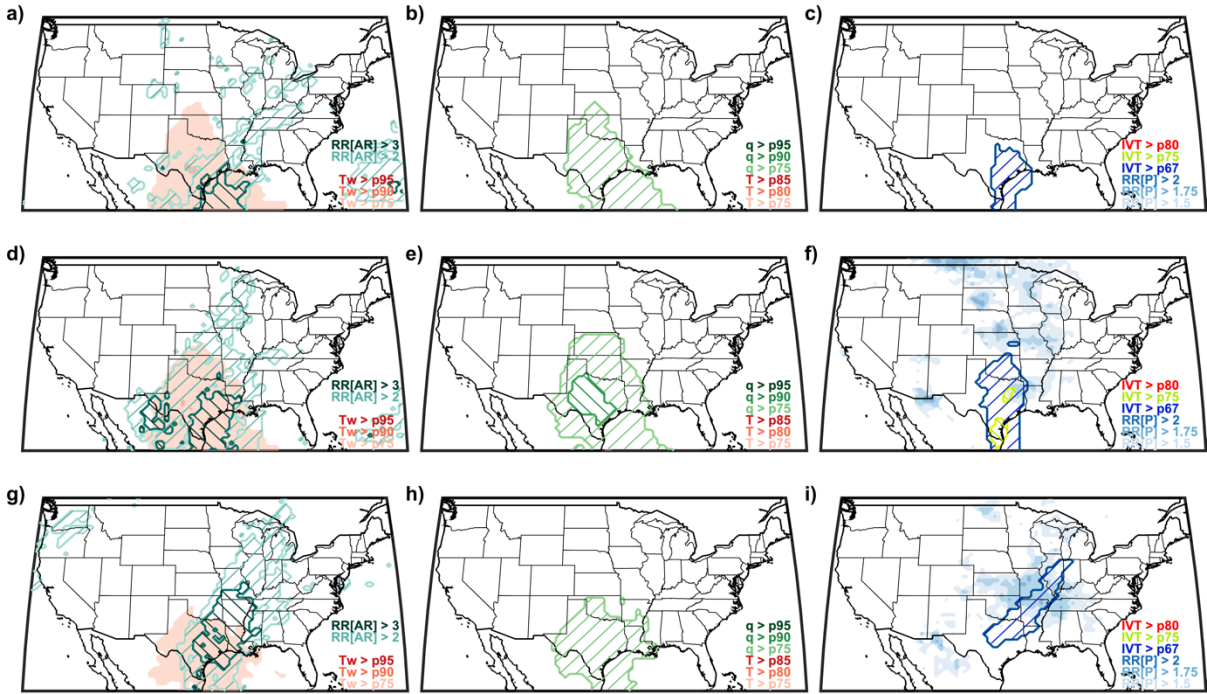

Figure S6: As in Figure 5 but for the Southeast region.

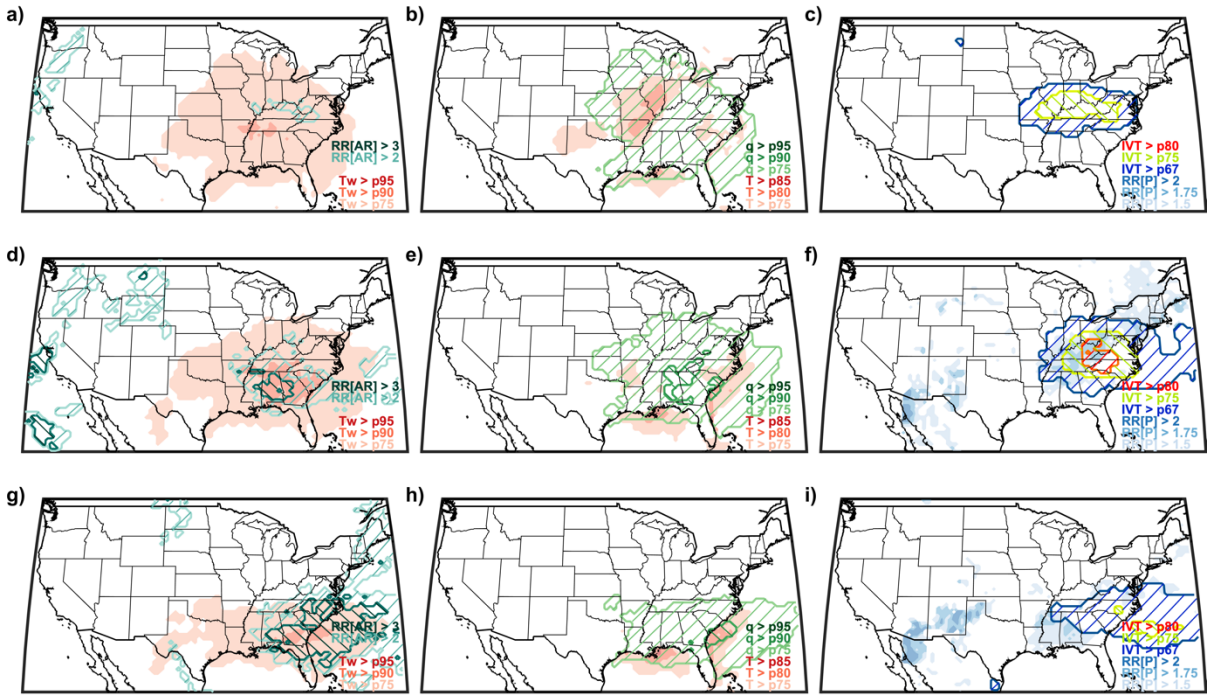



Figure S7: As in Figure 5 but for the Northeast region.

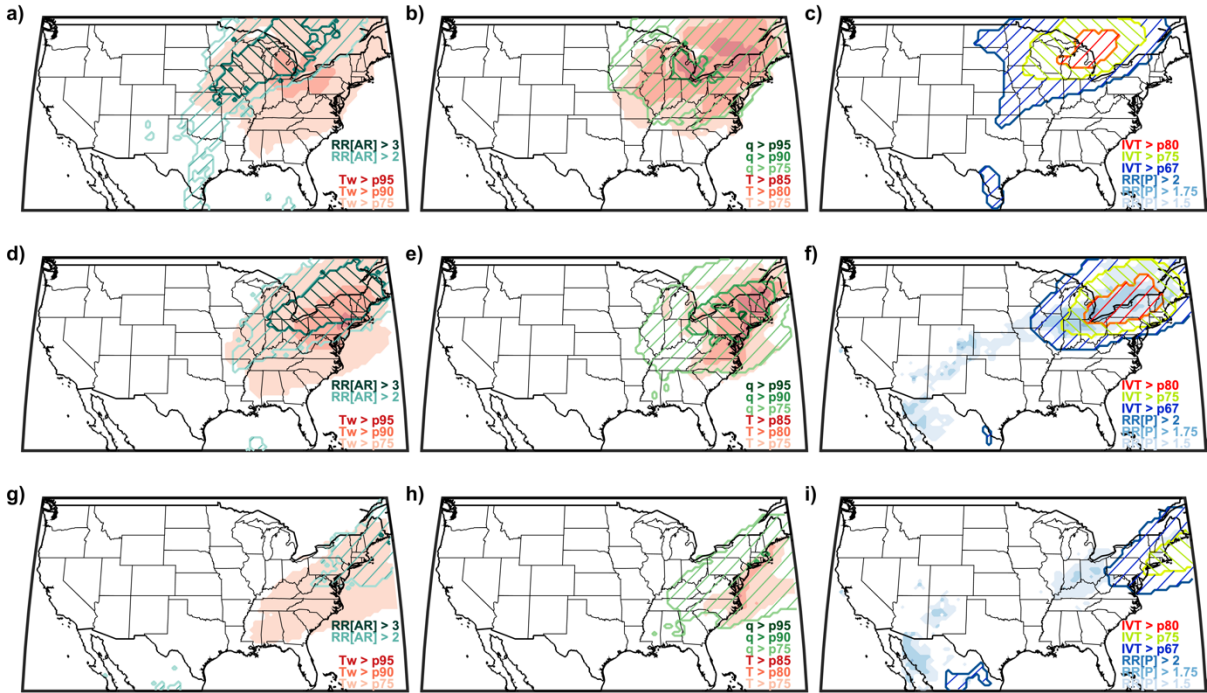



**Figure S8:** Mean relative extent of humid-heat gridcells in a region, partitioned according to the co-occurring daily terciles of IVT and precipitation in a 100-km radius around each gridcell in a 3-day period. The darkest shading highlights the combination of IVT and precipitation terciles most likely to co-occur with regional humid-heat days.

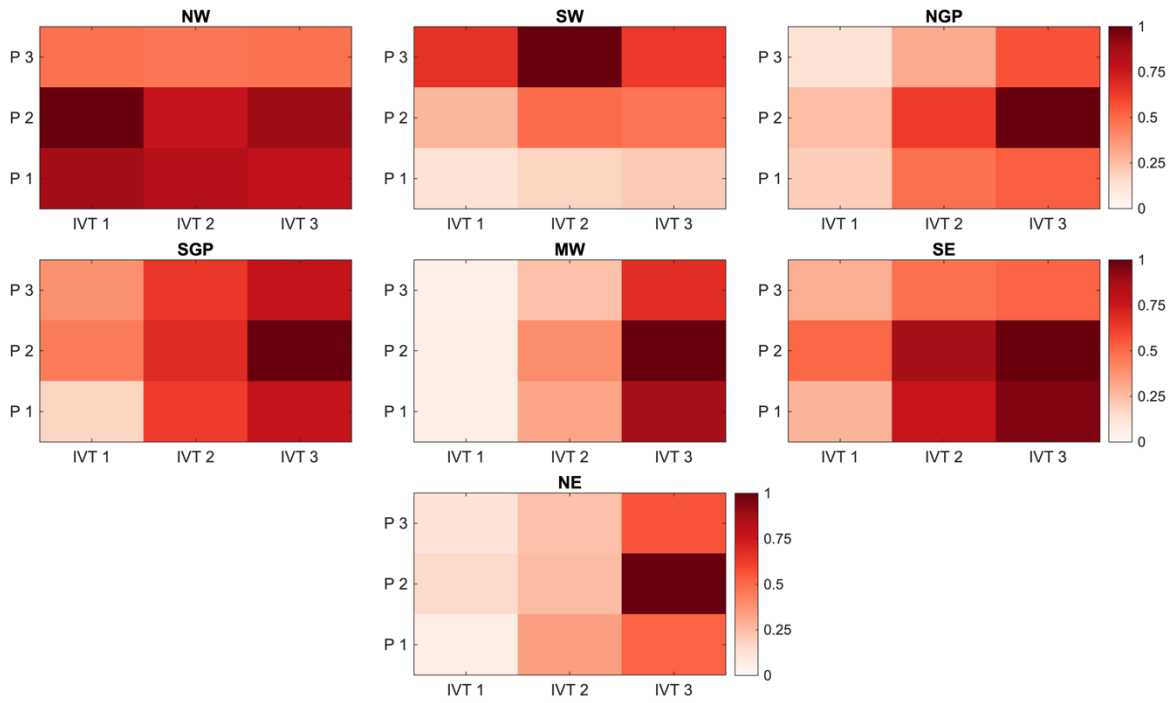

**Figure S9:** Comparison of Tw and precipitation composite percentiles, averaged across 11 HadISD (<https://www.metoffice.gov.uk/hadobs/hadis/>) weather stations and their closest MERRA-2 gridcells in the Midwest region. Stations are Chicago, IL; Columbia, MO; Grand Rapids, MI; Green Bay, WI; Indianapolis, IN; Madison, WI; Minneapolis, MN; Peoria, IL; Saginaw, MI; Sioux City, IA; and Youngstown, OH.

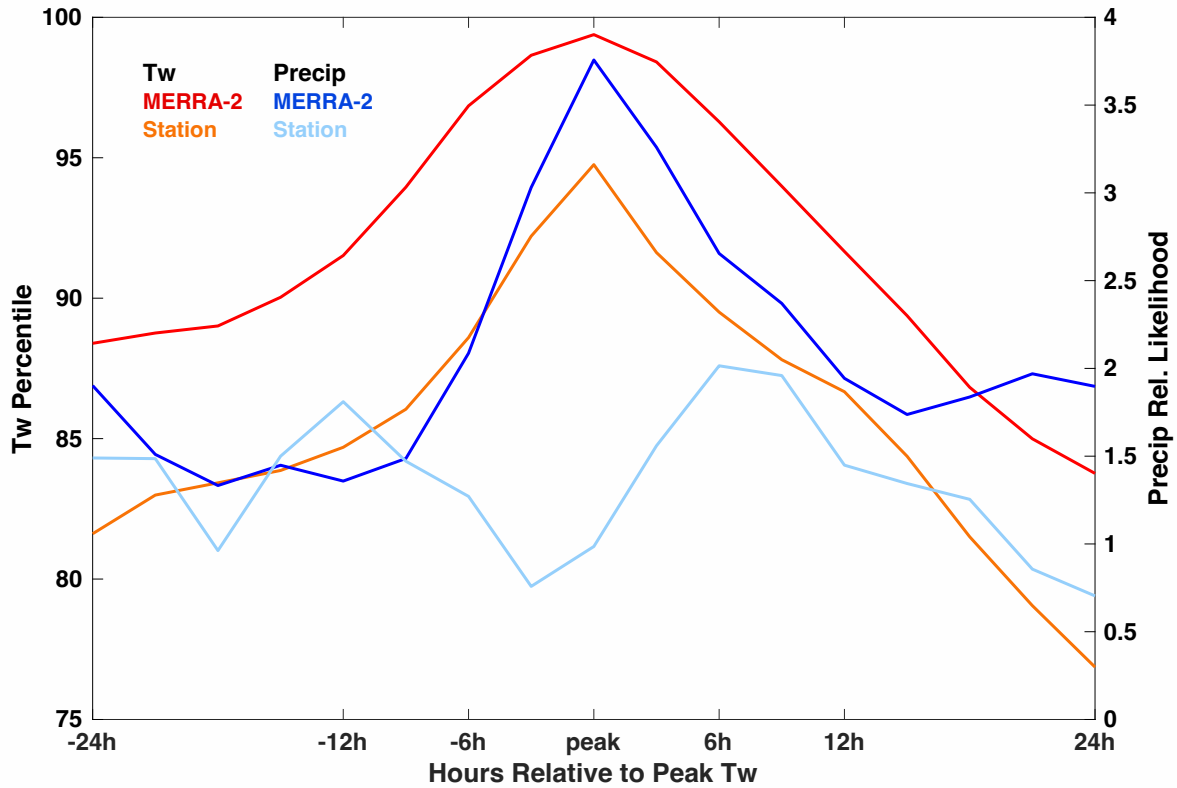

**Figure S10:** Composite of AR probabilities (contours) and Z500 anomalies (shading) for all AR days at the central gridcells of each region. Light (dark) green contours indicate AR probabilities  $>50\%$  ( $>80\%$ ), while light red (dark red) shading indicates Z500 anomalies  $>25$  m ( $>50$  m) and light blue (dark blue) shading indicates Z500 anomalies  $<-25$  m ( $<-50$  m).

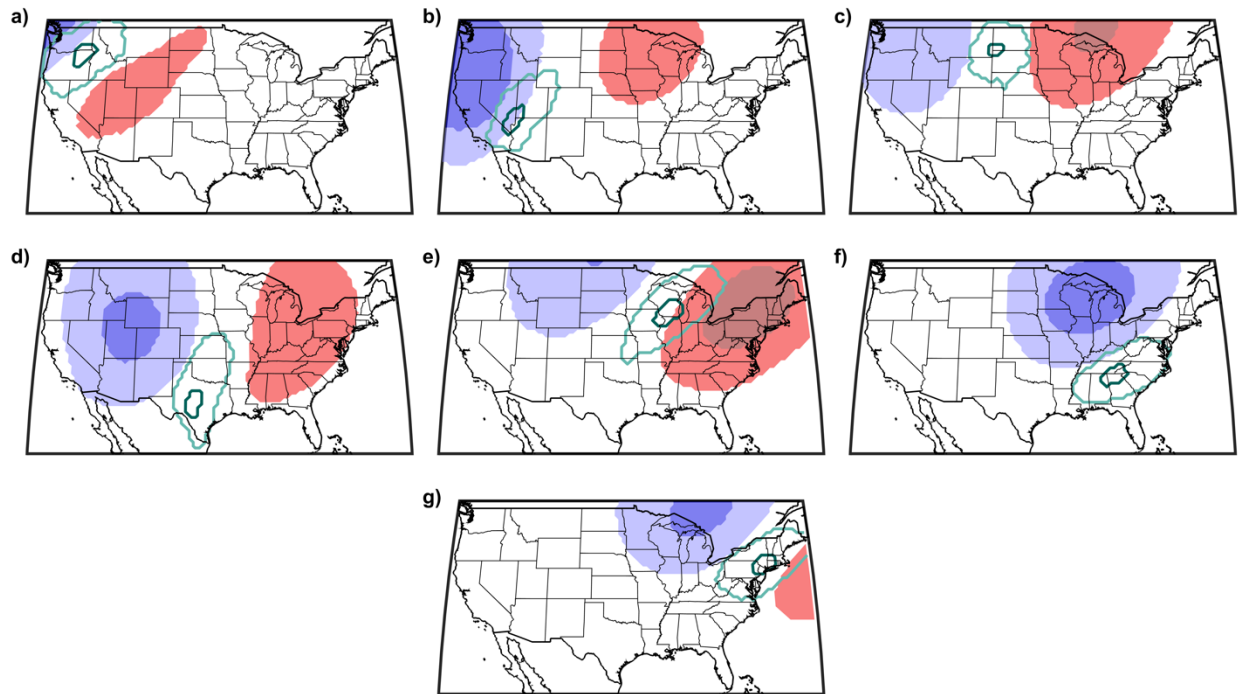

**Figure S11:** Composite of IVT percentiles (contours) and precipitation percentiles (shading) for all AR days at the central gridcells of each region. Orange (red) contours indicate IVT percentiles >70th (>85th), while light blue (dark blue) shading indicates precipitation percentiles >60th (>80th). These values are chosen to best highlight the regions of interest.

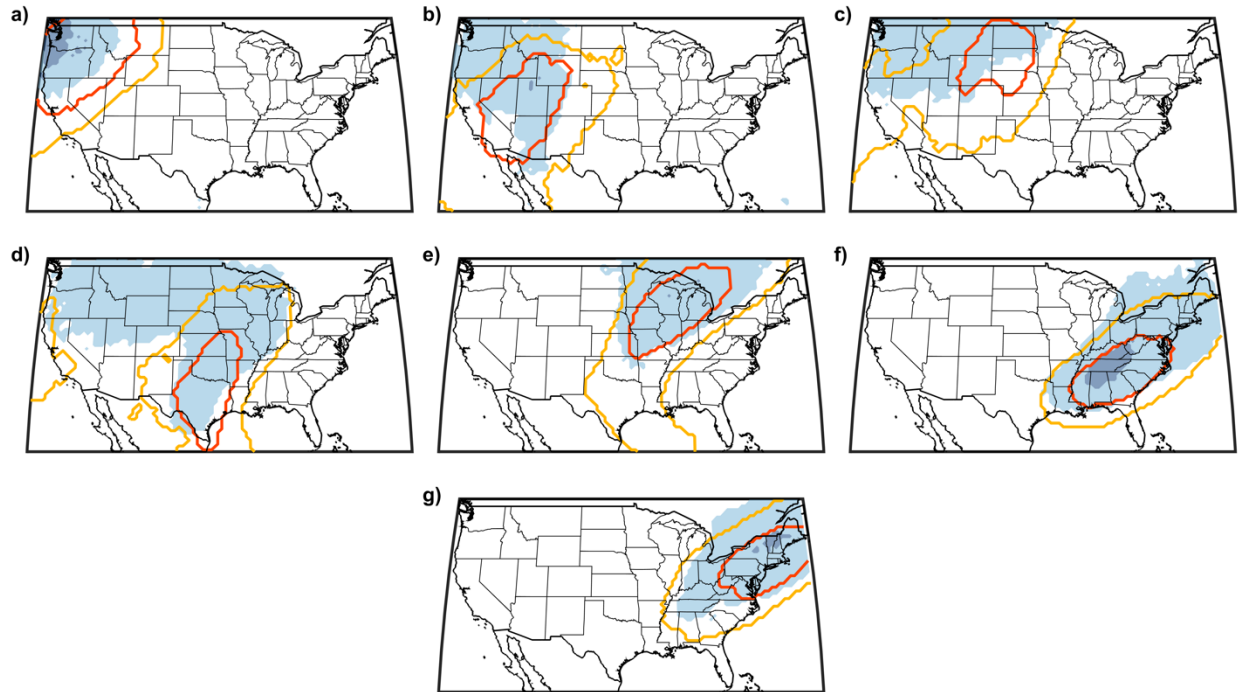

Figure S12: As in Figure 5 but for all humid-heat days.

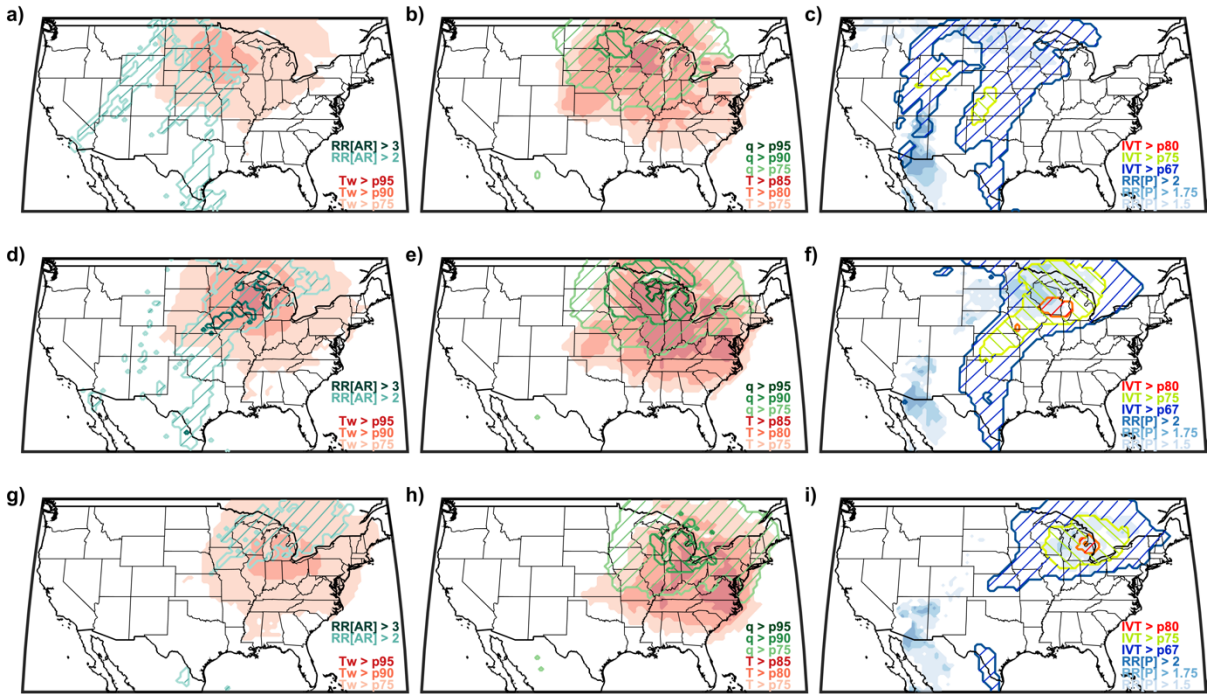

Supplement: Supplementary file 1 [file nhess-24-791-2024-supplement.pdf]
